# Supplementary material for: Co-occurrence of mutations in KIF7 and KIAA0556 in Joubert syndrome with ocular coloboma, pituitary malformation and growth hormone deficiency: a case report and literature review
Source: PubMed Central journal article supplement (PMC7066839; doi:10.1186/s12887-020-2019-0), 2020-03-12
Supplement: 12887_2020_2019_MOESM1_ESM.pdf [file 12887_2020_2019_MOESM1_ESM.pdf]

1 **Additional data**

2 **Supplementary Data 1**

3 Whole exome sequencing (WES) analysis was performed on genomic DNA extracted from peripheral blood  
4 leukocytes of the affected subject and his parents. Exome capture was carried out using Nextera Rapid  
5 Capture Exome Kit V1.2 (Illumina), and the following data analysis was performed using an in-house  
6 implemented pipeline which mainly take advantage of the BWA reads aligner (V.0.7.12, Li and Durbin, 2009)  
7 and Genome Analysis Toolkit (GATK V.3.7) (McKenna et al., 2010). GATK tools were used for realignment of  
8 sequences encompassing INDELS and for base quality recalibration. SNVs and small INDELS were identified  
9 by means of the GATK's HaplotypeCaller used in gVCF mode, followed by family-level joint genotyping and  
10 phasing. Finally, they were filtered by quality using a hard-filters strategy according to GATK's latest best  
11 practices. High-quality variants were then filtered against public databases (dbSNP150 and gnomAD 2.0) to  
12 retain private and clinically associated variants, and annotated variants with unknown frequency or having  
13 MAF <0.1%, and occurring with a frequency <1% in an *in-house* database including frequency data from  
14 approximately 1600 population-matched WES. SnpEff toolbox (V.4.3) was used to predict the functional  
15 impact of variants, which were filtered to retain only those located in exons with any effect on the coding  
16 sequence, and splice site regions (variants located from -3 to +8 with respect to an exon-intron junction).  
17 Functional annotation of variants was performed using SnpEff V.4.3 and dbNSFP V.2.9 (Cingolani et al., 2012;  
18 Liu et al., 2013; Kircher et al., 2014; Dong et al., 2015). WES statistics are reported in Supplementary Table 1.  
19 Functional impact of variants was analyzed by Combined Annotation Dependent Depletion (CADD) V.1.3, M-  
20 CAP V.1.0, InterVar V.0.1.7 and MetaDome algorithms (Kircher et al., 2014; Jagadeesh et al., 2016; Li and  
21 Wang, 2017; Wiel et al., 2019), to obtain clinical interpretation according to ACMG/AMP 2015 guidelines (Li  
22 and Wang, 2017). Data annotation predicted 19,871 high-quality variants having functional impact (*i.e.*, non-  
23 synonymous, indels and splice site changes) in the proband. Among them, 589 private and rare changes were  
24 retained for further analyses. Variants were prioritized on the basis of the functional relevance of genes,  
25 taking into account both dominant and recessive inheritance models.

26

27

28 **References Supplementary Data 1**

29 Li H and Durbin R. Fast and accurate short read alignment with Burrows-Wheeler transform. *Bioinformatics*.  
30 2009;25:1754-1760.

31 McKenna A, Hanna M, Banks E, Sivachenko A, Cibulskis K, et al. The Genome Analysis Toolkit: a MapReduce  
32 framework for analyzing next-generation DNA sequencing data. *Genome Res*. 2010;20:297-303.

33 Cingolani P, Platts A, Wang le L, et al. A program for annotating and predicting the effects of single  
34 nucleotide polymorphisms, SnpEff: SNPs in the genome of *Drosophila melanogaster* strain w1118; iso-2;  
35 iso-3. *Fly*. 2012;6:80-92.

36 Liu X, Jian X, Boerwinkle E. dbNSFP v2.0: a database of human non-synonymous SNVs and their functional  
37 predictions and annotations. *Hum Mutat*. 2013;34:E2393-402.

38 Kircher M, Witten DM, Jain P, O'Roak BJ, Cooper GM, Shendure J. A general framework for estimating the  
39 relative pathogenicity of human genetic variants. *Nat Genet*. 2014;46:310–5.

40 Dong C, Wei P, Jian X, Gibbs R, Boerwinkle E, Wang K, Liu X. Comparison and integration of deleteriousness  
41 prediction methods for nonsynonymous SNVs in whole exome sequencing studies. *Hum Mol*  
42 *Genet*. 2015;24:2125-37.

43 Jagadeesh KA, Wenger AM, Berger MJ, Guturu H, Stenson PD, Cooper DN, Bernstein JA, Bejerano G. M-CAP  
44 eliminates a majority of variants of uncertain significance in clinical exomes at high sensitivity. *Nat Genet*.  
45 2016;48:1581-1586.

46 Li Q, Wang K. InterVar: Clinical Interpretation of Genetic Variants by the 2015 ACMG-AMP Guidelines. *Am J*  
47 *Hum Genet*. 2017;100:267-280.

48 Wiel L, Baakman C, Gilissen D, Veltman JA, Vriend G, Gilissen C. MetaDome: Pathogenicity analysis of  
49 genetic variants through aggregation of homologous human protein domains. *Hum Mutat*. 2019;40:1030-  
50 1038.

51

52

53

54

55 **Supplementary Table S1. Whole exome sequencing metrics, statistics and output**

56

|                                                                                | OPBG_13-16     |
|--------------------------------------------------------------------------------|----------------|
| Target regions coverage, 2x <sup>1</sup>                                       | 96.9%          |
| Target regions coverage, 10x <sup>1</sup>                                      | 95.2%          |
| Target regions coverage, 20x <sup>1</sup>                                      | 92.2%          |
| Average sequencing depth on target <sup>1</sup>                                | 95x            |
| Number of variants with predicted functional effect                            | 19,871         |
| Novel, clinically associated, and unknown/low frequency variants <sup>2</sup>  | 589            |
| Putative disease genes (autosomal recessive/X-linked inheritance) <sup>3</sup> | 6 <sup>4</sup> |
| Putative disease genes ( <i>de novo</i> variants) <sup>3</sup>                 | 0              |

57

58 <sup>1</sup>Referred to Nextera Rapid Capture Exome Kit V1.2 (Illumina).

59 <sup>2</sup>MAF <0.1% in gnomAD V. 2.0 databases, and frequency <1% in our *in-house* database.

60 <sup>3</sup>Filtering retained genes with high-quality and functionally relevant variants by excluding those predicted as  
61 benign by CADD (scaled score <15) and M-CAP algorithms or benign/likely benign by interVar.

62 <sup>4</sup>*APEX2* (c.622T>C, p.Trp208Arg), *MAGEA4* (c.799C>T, p.Pro267Ser), ***KIF7* (c.2675G>A, p.Arg892His)**, *BFAR*

63 (c.188C>A, p.Ala63Glu), ***KIAA0556* (c.3756dupC, p.Arg1253fs\*5)**, *OBSCN* (c.5332C>T, p.Gln1778\*; c.11362C>A,  
64 p.Pro3788Thr).

65
